# Supplementary material for: Prevalence and Predictors of Clozapine-Associated Constipation: A Systematic Review and Meta-Analysis
Source: Int J Mol Sci. 2016 Jun 2;17(6):863. doi: 10.3390/ijms17060863 (PMC4926397; doi:10.3390/ijms17060863)
Supplement: Supplementary file 1 [file ijms-17-00863-s001.pdf]

# Supplementary Materials: Prevalence and Predictors of Clozapine-Associated Constipation: A Systematic Review and Meta-Analysis

Ayala Shirazi, Brendon Stubbs, Lucia Gomez, Susan Moore, Fiona Gaughran, Robert J. Flanagan, James H. MacCabe and John Lally

**Table S1.** Summary of included studies comparing the prevalence of constipation among clozapine-treated patients against patients treated using other antipsychotics.

| Study                                  | Location, Design, Setting, and Constipation Assessment Method           | Clozapine-Treated Patients, N, Age, % Male | Other Antipsychotics-Treated Patients, N, Age, % Male | Mean Clozapine Dose (mg) $\pm$ SD * | Number (%) Clozapine-Treated Patients with Constipation | Number (%) Patients with Constipation in Other Antipsychotics Group |
|----------------------------------------|-------------------------------------------------------------------------|--------------------------------------------|-------------------------------------------------------|-------------------------------------|---------------------------------------------------------|---------------------------------------------------------------------|
| Azorin <i>et al.</i> , 2001 [76]       | Canada and France, RCT, Mixed in- and out-patients, Self-reported       | N = 136, 37.8 $\pm$ 10.4 years, 77% male   | N = 134, 39.5 $\pm$ 11.3 years, 65.4% male            | 642 $\pm$ 212                       | 19 (14%)                                                | 11 (8.2%)                                                           |
| Baptista <i>et al.</i> , 2015 [51]     | Venezuela, Cross-sectional study, Out-patients, Rome III criteria       | N = 45, 46.1 $\pm$ 11.9 years, 66.7% male  | N = 64, 41.7 $\pm$ 13.3 years, 40.6% male             | 155 $\pm$ 86                        | 15 (33.3%)                                              | 8 (12.5%)                                                           |
| Brunette <i>et al.</i> , 2011 [78]     | USA, RCT, Out-patients, Clinician diagnosis                             | N = 15, 33.3 $\pm$ 10.0 years, 80% male    | N = 31, 39 $\pm$ 10.2 years, 75% male                 | 319 $\pm$ 163.5                     | 4 (26.7%)                                               | 4 (12.9%)                                                           |
| Buchanan <i>et al.</i> , 1998 [79]     | USA, RCT, Out-patients, Adverse events checklist                        | N = 38, 41 $\pm$ 6.4 years, 65.8% male     | N = 37, 40.1 $\pm$ 7.9 years, 73% male                | 415 $\pm$ 50.7                      | 6 (16.1%)                                               | 7 (19%)                                                             |
| Every-Palmer <i>et al.</i> , 2016 [75] | New Zealand, Cross-sectional study, In-patient study, Rome III criteria | N = 20, 37 $\pm$ 8.2 years, 70% male       | N = 17, 42 $\pm$ 10.9 years, 88.2% male               | 528 $\pm$ 161                       | 11 (57.9%)                                              | 4 (23.5%)                                                           |
| Kelly <i>et al.</i> , 2003 [80]        | USA, RCT, In-patients, Adverse events checklist                         | N = 10, 37.58 $\pm$ 8.96 years, 80% male   | N = 10, 37.6 $\pm$ 9.0 years, 80% male                | 450 $\pm$ 0                         | 6 (10%)                                                 | 6 (60%)                                                             |

Table S1. Cont.

| Study                               | Location, Design, Setting, and Constipation Assessment Method                                                                                                              | Clozapine-Treated Patients, N, Age, % Male | Other Antipsychotics-Treated Patients, N, Age, % Male | Mean Clozapine Dose (mg) $\pm$ SD * | Number (%) Clozapine-Treated Patients with Constipation | Number (%) Patients with Constipation in Other Antipsychotics Group |
|-------------------------------------|----------------------------------------------------------------------------------------------------------------------------------------------------------------------------|--------------------------------------------|-------------------------------------------------------|-------------------------------------|---------------------------------------------------------|---------------------------------------------------------------------|
| Kluge <i>et al.</i> , 2007 [73]     | Germany, RCT, In-patients, Self-reported                                                                                                                                   | N = 15, 36.7 $\pm$ 13 years, 47% male      | N = 15, 32.8 $\pm$ 8.3 years, 33% male                | 266.7 $\pm$ 77.9                    | 3 (20%)                                                 | 1 (7%)                                                              |
| Meltzer <i>et al.</i> , 2003 [10]   | USA, Canada, UK, Italy, Croatia, France, South Africa, Argentina, Chile, Czech republic, Hungary, RCT, Out-patients, Self-reported                                         | N = 479, 37.1 $\pm$ 10.3 years, 82% male   | N = 477, 37 $\pm$ 10.3 years, 79% male                | 274.2 $\pm$ 155                     | 120 (25.1%)                                             | 46 (9.6%)                                                           |
| Naber <i>et al.</i> , 2005 [81]     | Germany, RCT, In-patients, Self-reported                                                                                                                                   | N = 57, 35.2 $\pm$ 10.8 years, 61.4% male  | N = 57, 32.9 $\pm$ 10.4 years, 61.4% male             | 209 $\pm$ 91                        | 12 (21%)                                                | 0 (0%)                                                              |
| Tang <i>et al.</i> , 2011 [74]      | China, RCT, In-patients, Adverse events checklist                                                                                                                          | N = 30, 28.6 $\pm$ 8.5 years, 61% male     | N = 32, 28.4 $\pm$ 9 years, 60% male                  | No mean stated (range 200–500)      | 22 (73.3%)                                              | 4 (12.5%)                                                           |
| Tollefson <i>et al.</i> , 2001 [77] | UK, Belgium, Italy, Finland, Spain, Germany, Denmark, France, Norway, Portugal, South Africa, Sweden, Switzerland, Ireland, RCT, Mixed in- and out-patients, Self-reported | N = 90, 38.6 $\pm$ 10.6 years, 0% male     | N = 90, 38.6 $\pm$ 10.6 years, 0% male                | 303.6 $\pm$ 108.7                   | 17 (18.9%)                                              | 6 (6.7%)                                                            |

\* In clozapine-treated patients.

**Table S2.** Summary of non-controlled studies included measuring the prevalence of constipation in clozapine-treated patients.

| Study                                | Location, Design and Setting                                                     | Clozapine-Treated Patients, N, Age, % Male        | Mean Clozapine Dose (mg) $\pm$ SD | Number (%) Clozapine-Treated Patients with Constipation |
|--------------------------------------|----------------------------------------------------------------------------------|---------------------------------------------------|-----------------------------------|---------------------------------------------------------|
| Aamani <i>et al.</i> , 2015 [58]     | India,<br>Prospective cohort,<br>In-patients,<br>Clinician diagnosis             | N = 30,<br>Mean age not stated,<br>70% males      | 450 $\pm$ not stated              | 7 (24%)                                                 |
| Antonacci & de Groot, 2000 [50]      | USA,<br>Retrospective cohort,<br>In-patients,<br>Self-reported                   | N = 33,<br>40.2 $\pm$ 9.7 years,<br>51.1% males   | 400 $\pm$ not stated              | 10 (30.3%)                                              |
| Bailey, 2015 [57]                    | UK,<br>Retrospective cohort,<br>Out-patients,<br>Laxative use                    | N = 202,<br>44.6 $\pm$ not stated,<br>69.8% males | 393.8 $\pm$ not stated            | 71 (35%)                                                |
| Centorrino <i>et al.</i> , 1994 [72] | USA,<br>Cross-sectional,<br>Out-patients,<br>Adverse events checklist            | N = 44,<br>36 $\pm$ 9.1 years,<br>75% males       | 294 $\pm$ 165                     | 14 (32%)                                                |
| De Leon, 2003 [17]                   | USA,<br>Prospective cohort,<br>In-patients,<br>Adverse events checklist          | N = 27,<br>44.8 $\pm$ 9.6 years,<br>44% males     | 600 $\pm$ 0                       | 9 (33%)                                                 |
| Drew, 1999 [69]                      | Australia,<br>Retrospective cohort,<br>Out-patients,<br>Adverse events checklist | N = 24,<br>34.5 $\pm$ 8.5 years,<br>56% males     | 410 $\pm$ not stated              | 5 (20.8%)                                               |
| Dutt <i>et al.</i> , 2010 [49]       | India,<br>Prospective cohort,<br>In-patients,<br>Clinician diagnosis             | N = 51,<br>32.1 $\pm$ 6.9 years,<br>80.4% males   | 298.97 $\pm$ 94.3                 | 8 (15.6%)                                               |

Table S2. Cont.

| Study                             | Location, Design and Setting                                                                    | Clozapine-Treated Patients, N, Age, % Male            | Mean Clozapine Dose (mg) $\pm$ SD | Number (%) Clozapine-Treated Patients with Constipation |
|-----------------------------------|-------------------------------------------------------------------------------------------------|-------------------------------------------------------|-----------------------------------|---------------------------------------------------------|
| Ebrahim <i>et al.</i> , 1994 [65] | USA,<br>Prospective cohort,<br>In-patients,<br>Self-reported                                    | N = 27,<br>33.8 $\pm$ 6.87 years,<br>100% males       | 558 $\pm$ 210                     | 18 (66%)                                                |
| Faasen <i>et al.</i> , 2014 [71]  | South Africa,<br>Cross-sectional,<br>Out-patients,<br>Self-reported                             | N = 29,<br>40.1 $\pm$ 9.9 years,<br>90% males         | 319.8 $\pm$ 158.3                 | 13 (44.8%)                                              |
| Golden, 2008 [62]                 | South Africa,<br>RCT,<br>Out-patients,<br>Clinician diagnosis                                   | N = 36,<br>39.8 $\pm$ 9.4 years,<br>64% males         | 200 $\pm$ 0                       | 3 (8.3%)                                                |
| Hayes and Gibler, 1995 [59]       | USA,<br>Retrospective cohort,<br>In-patients,<br>Self-reported                                  | N = 53,<br>Mean age not stated,<br>% males not stated | Mean dose not stated              | 32 (60%)                                                |
| Honer <i>et al.</i> , 2006 [63]   | Canada, Germany, China, UK,<br>RCT,<br>Mixed in- and out- patients,<br>Adverse events checklist | N = 33,<br>34.9 $\pm$ 8.5 years,<br>74% males         | 492 $\pm$ 131                     | 7 (21%)                                                 |
| Hynes <i>et al.</i> , 2015 [24]   | UK,<br>Outpatients,<br>Cross-sectional,<br>Adverse events checklist                             | N = 110,<br>42 $\pm$ 10.1 years,<br>87% males         | 332 $\pm$ 134                     | 53 (48%)                                                |
| Kelly <i>et al.</i> , 2015 [64]   | USA,<br>RCT,<br>Mixed in- and out-patients,<br>Adverse events checklist                         | N = 23,<br>42.3 $\pm$ 11 years,<br>78% males          | 433.7 $\pm$ 140.1                 | 10 (43%)                                                |

Table S2. Cont.

| Study                               | Location, Design and Setting                                                 | Clozapine-Treated Patients, N, Age, % Male       | Mean Clozapine Dose (mg) $\pm$ SD | Number (%) Clozapine-Treated Patients with Constipation |
|-------------------------------------|------------------------------------------------------------------------------|--------------------------------------------------|-----------------------------------|---------------------------------------------------------|
| Kim <i>et al.</i> , 2009 [66]       | South Korea,<br>Prospective cohort,<br>Outpatients,<br>Self-reported         | N = 19,<br>36.4 $\pm$ 7.1 years,<br>69.2% males  | 600 $\pm$ not stated              | 4 (21%)                                                 |
| Kishi <i>et al.</i> , 2013 [61]     | Japan,<br>Prospective cohort,<br>In-patients,<br>Clinician diagnosis         | N = 38,<br>47.6 $\pm$ 2.5 years,<br>47.4% males  | 328 $\pm$ not stated              | 25 (65.8%)                                              |
| Lieberman <i>et al.</i> , 1994 [60] | USA,<br>Prospective cohort,<br>In-patients,<br>Adverse events checklist      | N = 77,<br>28.2 $\pm$ 6.1 years,<br>67% males    | 458 $\pm$ 222                     | 41(53.3%)                                               |
| Lokshin, 1999 [48]                  | Israel,<br>Retrospective cohort,<br>In-patients,<br>Self-reported            | N = 59,<br>37.6 $\pm$ not stated,<br>67.8% males | 202 $\pm$ not stated              | 7 (12%)                                                 |
| Spina <i>et al.</i> , 2000 [68]     | Italy,<br>Prospective cohort,<br>Out-patients,<br>Clinician diagnosis        | N = 45,<br>38.1 $\pm$ 10.4 years,<br>78% males   | 309 $\pm$ 63                      | 3 (6.7%)                                                |
| Srivastava, 2002 [56]               | India,<br>Retrospective cohort,<br>Out-patients,<br>Adverse events checklist | N = 15,<br>30.6 $\pm$ 6.2 years,<br>60% males    | 248.21 $\pm$ not stated           | 1 (6.7%)                                                |
| Yusufi <i>et al.</i> , 2007 [70]    | UK,<br>Cross-sectional,<br>In-patients,<br>Adverse events checklist          | N = 103,<br>39.3 $\pm$ 8.8 years,<br>69% males   | 456 $\pm$ 209                     | 35 (34%)                                                |
